# Supplementary material
Source: PubMed Central journal article supplement (PMC4767172)
Supplement: NIHMS754822-supplement-1.pdf [file NIHMS754822-supplement-1.pdf]

Cell Reports

Supplemental Information

***C. elegans* Body Cavity Neurons Are Homeostatic  
Sensors that Integrate Fluctuations in Oxygen  
Availability and Internal Nutrient Reserves**

Emily Witham, Claudio Comunian, Harkaranveer Ratanpal, Susanne Skora, Manuel Zimmer, and Supriya Srinivasan

**Figure S1**

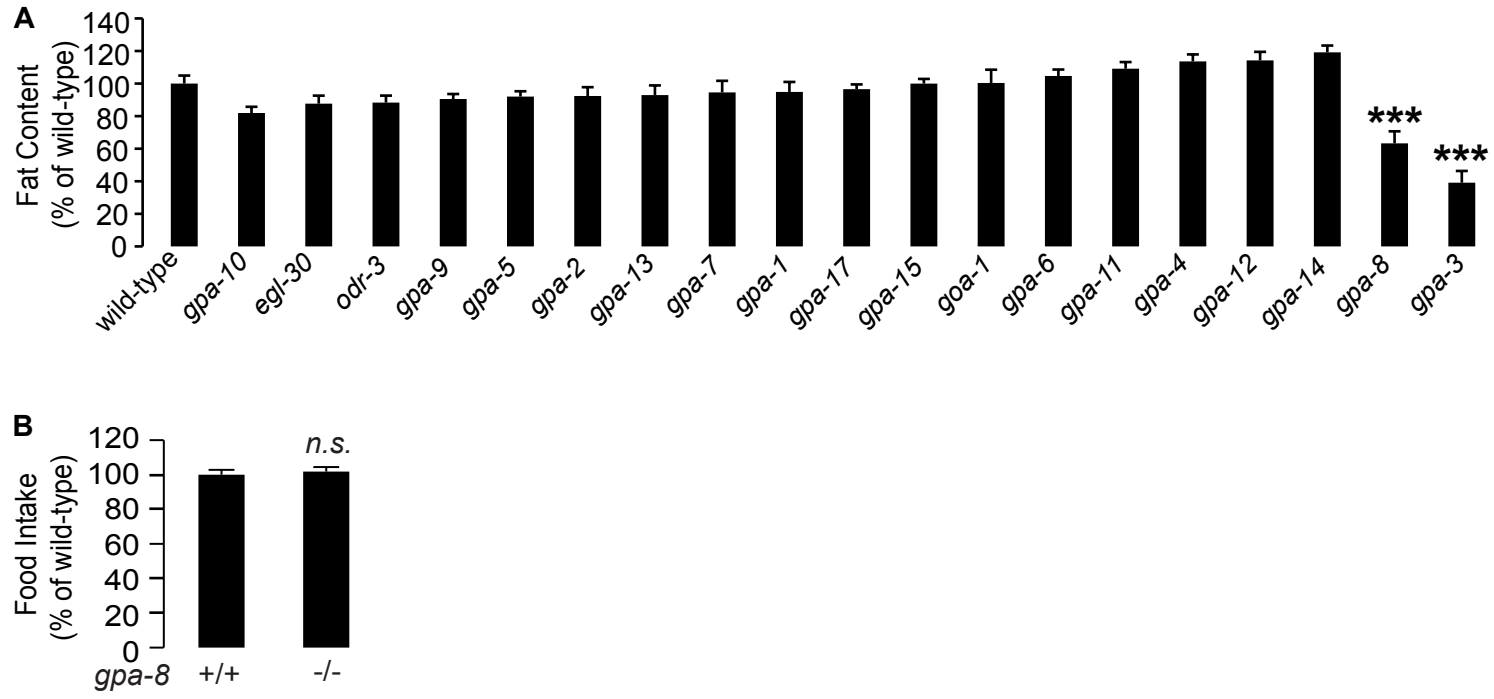

**Figure S1. GPA-8 is required to maintain peripheral fat levels, related to Figure 1.**

(A) All viable *C. elegans*  $G\alpha$  mutants were fixed and stained with oil Red O. Fat content was quantified for each genotype and is expressed as a percentage of wild-type animals  $\pm$  SEM (n=10–20). \*\*\*,  $p < 0.001$  by Student's t-test.

(B) Food intake was measured by counting the rhythmic contractions of the pharyngeal bulb over a 10 s period using a Zeiss M2-Bio microscope at 10X magnification. Data are expressed as a percentage of wild-type animals  $\pm$  SEM. n.s., not significant by Student's t-test.

Figure S2

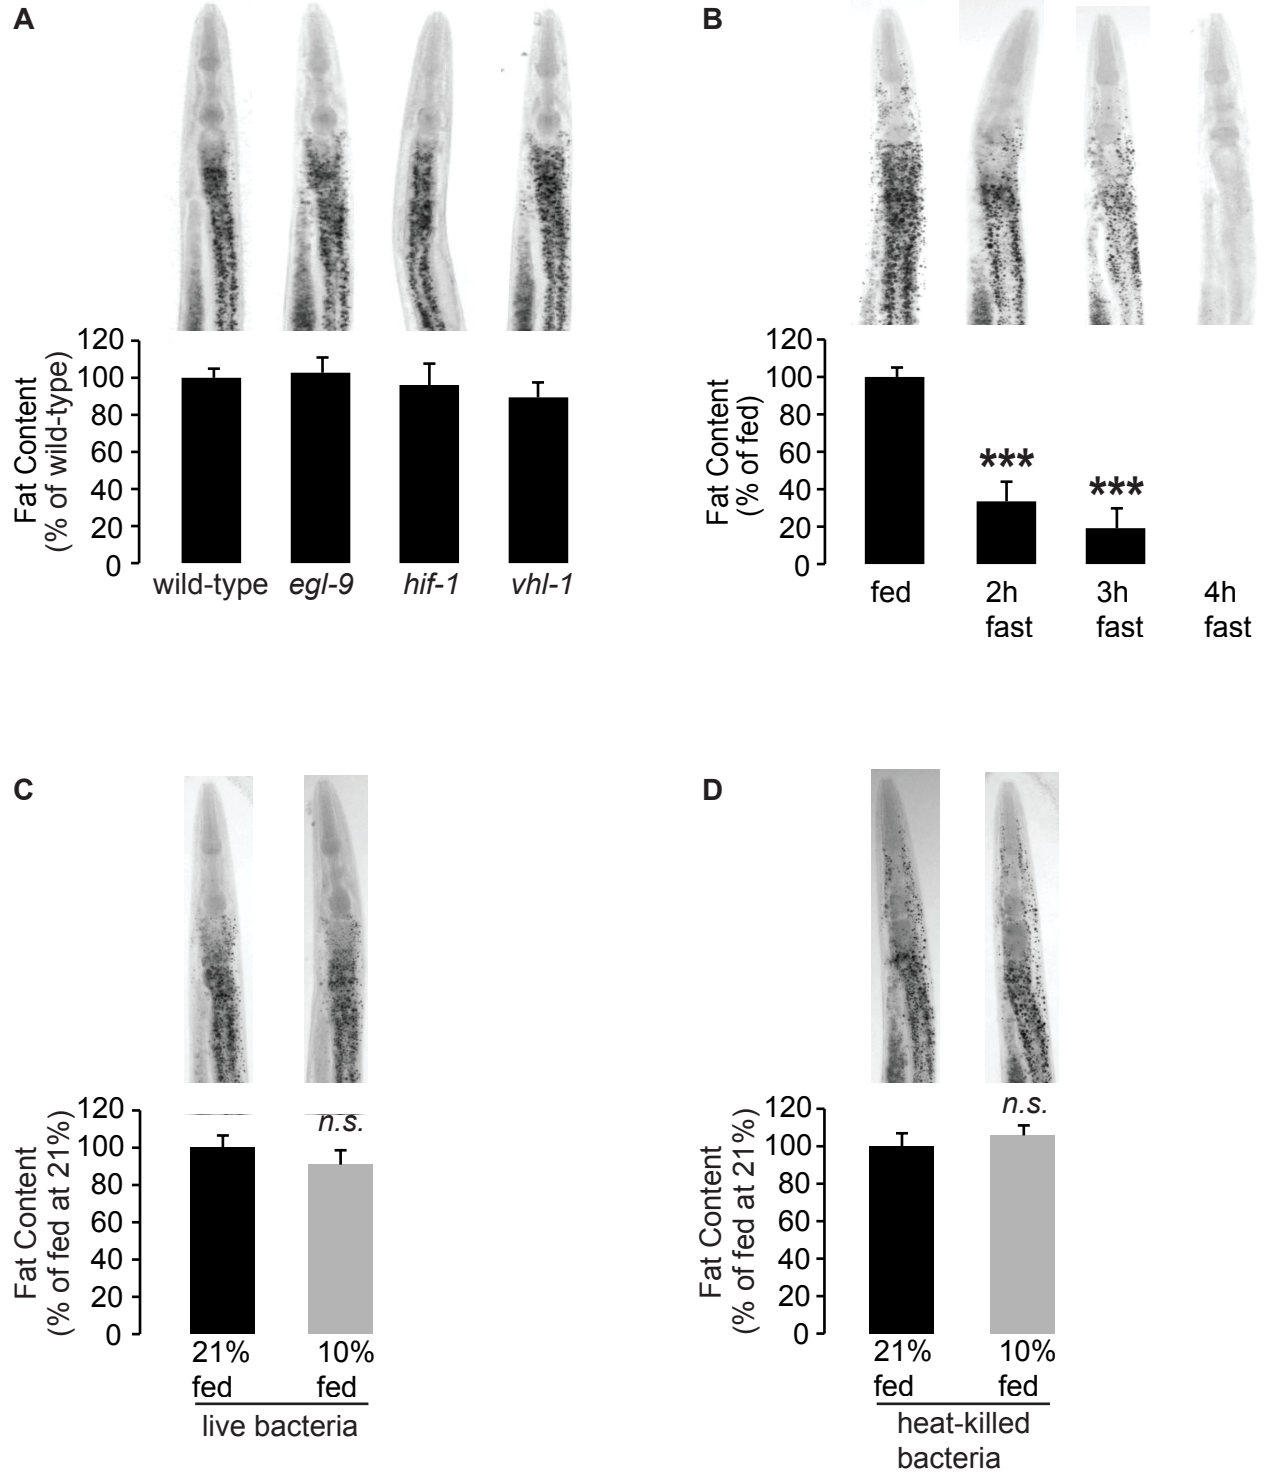



**Figure S2. Oxygen-dependent fat regulation is not a function of the hypoxia-sensing pathway, related to Figure 3.**

(A) Representative images are shown of animals fixed and stained with oil Red O (upper panels). Fat content was quantified for each genotype and is expressed as a percentage of wild-type animals  $\pm$  SEM (lower panels; n=8-10). No significant differences were observed by one-way ANOVA.

(B) Wild-type adult animals were fasted for either 2, 3, or 4 h. Representative images are shown of animals fixed and stained with oil Red O (upper panels). Fat content was quantified for each condition and is expressed as a percentage of fed animals  $\pm$  SEM (lower panels; n=11-18). \*\*\*,  $p < 0.001$  by Student's t-test.

(C) Wild-type adult animals on live bacteria were exposed to either 21% or 10% oxygen for a period of 2.5 h. Representative images are shown of animals fixed and stained with oil Red O (upper panels). Fat content was quantified and is expressed as a percentage of animals exposed to 21% oxygen  $\pm$  SEM (lower panels; n=17-19). n.s., not significant by Student's t-test.

(D) Wild-type adult animals raised on live bacteria were washed once and transferred to plates containing heat-killed bacteria. Animals were exposed to either 21% or 10% oxygen for a period of 2.5 h. Representative images are shown of animals fixed and stained with oil Red O (upper panels). Fat content was quantified and is expressed as a percentage of animals exposed to 21% oxygen  $\pm$  SEM (lower panels; n=20-23). n.s., not significant by Student's t-test.

Figure S3

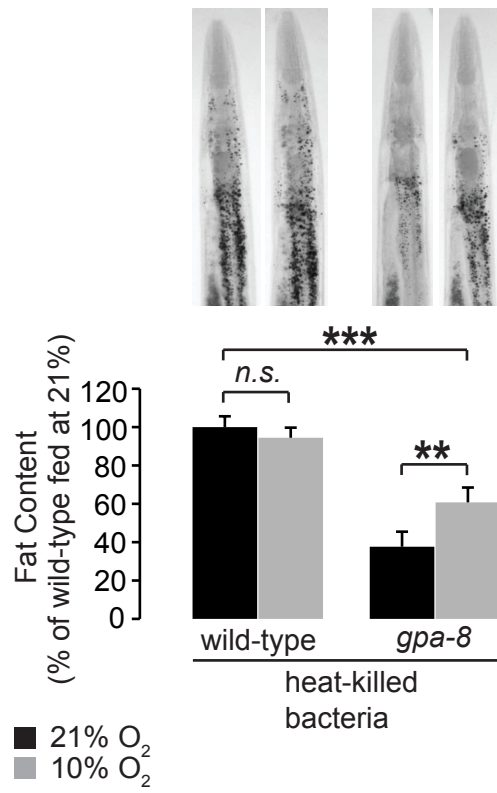

**Figure S3. *gpa-8* mutants show oxygen-dependent fat regulation on heat-killed bacteria, related to Figure 3.**

Adult wild-type adult animals and *gpa-8* mutants raised on live bacteria were washed once and transferred to plates containing heat-killed bacteria. Animals were exposed to either 21% or 10% oxygen for a period of 2.5 h. Representative images are shown of animals fixed and stained with oil Red O (upper panels). Fat content was quantified and is expressed as a percentage of wild-type animals exposed to 21% oxygen  $\pm$  SEM (lower panels; n=20-21). \*\*, p<0.01 and \*\*\*, p<0.001 by two-way ANOVA.

**Figure S4**

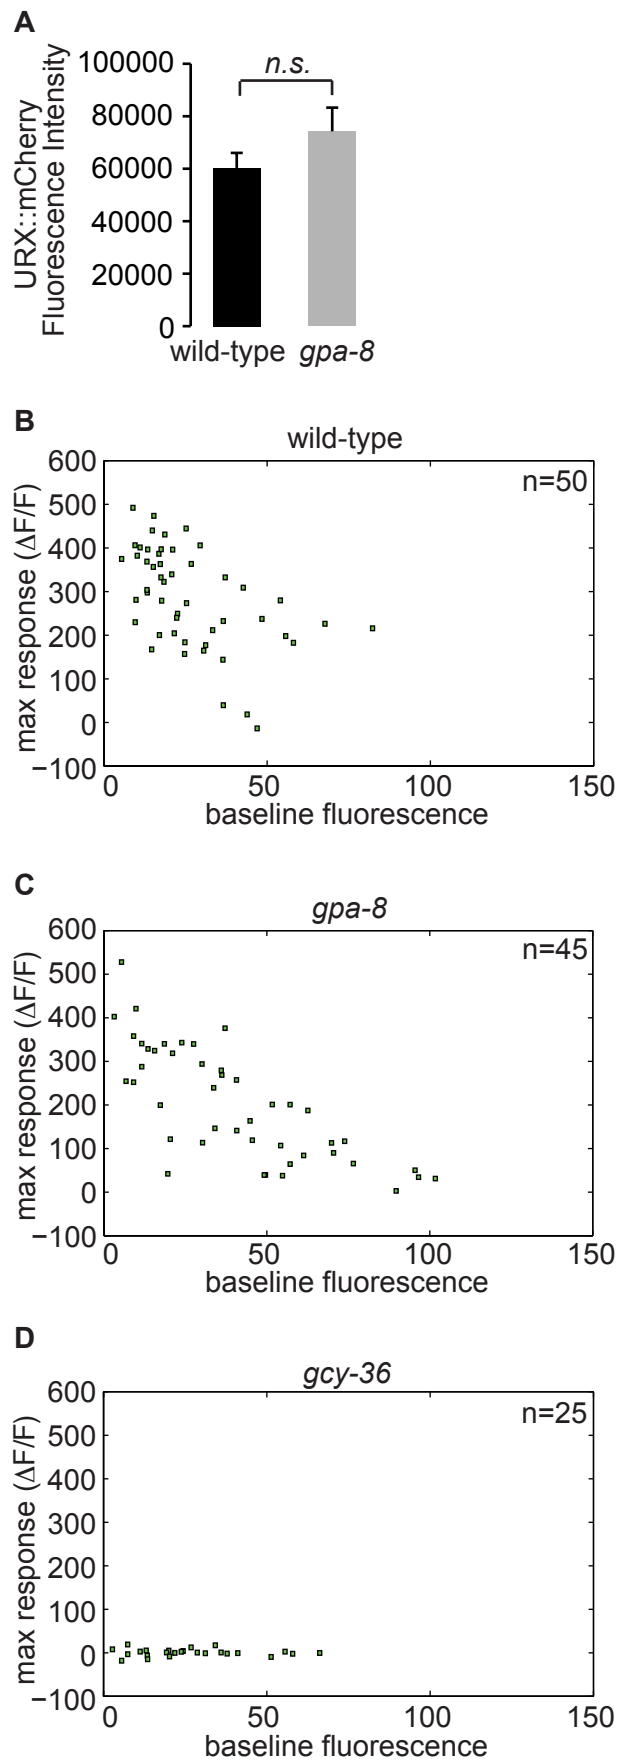

**Figure S4. Properties of URX neurons in wild-type, *gpa-8* mutants and *gcy-36* mutants, related to Figure 4.**

(A) We imaged mCherry fluorescence in wild-type and *gpa-8* animals expressing both GCaMP5k and mCherry under the control of the *flp-8* promoter. Images were taken in animals exposed to 21% oxygen. For each genotype, the fluorescence intensity was imaged at the same exposure, determined to be within the linear range. Fluorescence intensity was quantified and expressed as an average  $\pm$  SEM (n=34). n.s., not significant by Student's t-test.

(B-D) Maximum  $\Delta F/F_0$  values at 21% oxygen are plotted against the baseline fluorescence at 10% oxygen ( $F_0$ ) for each animal in the wild-type, *gpa-8*, and *gcy-36* backgrounds (n=25-50).

**Figure S5**

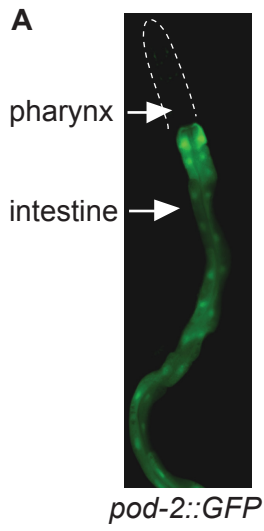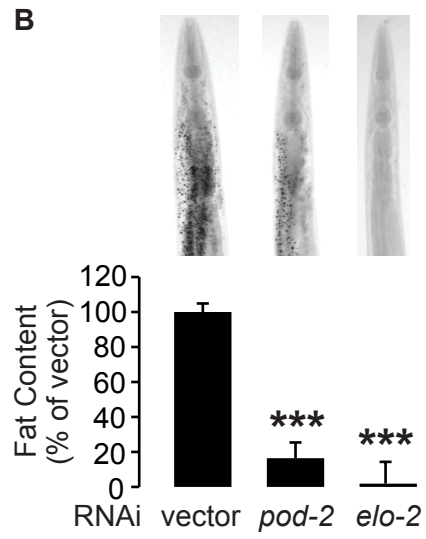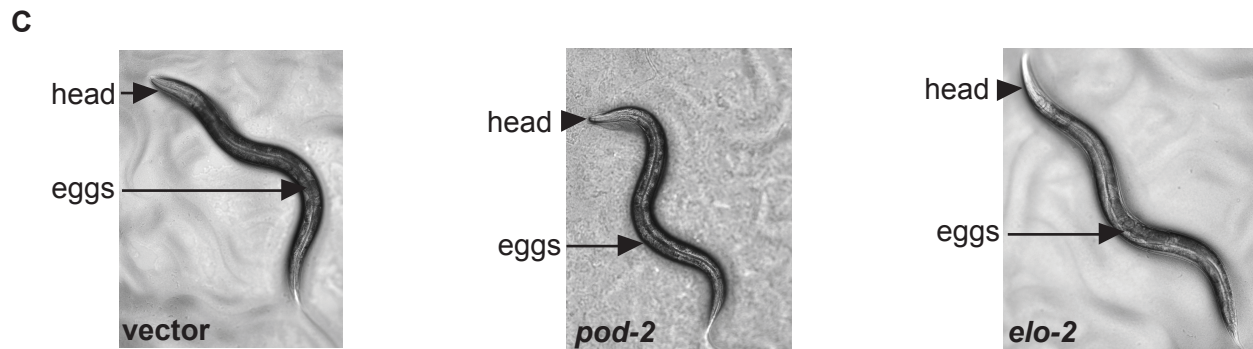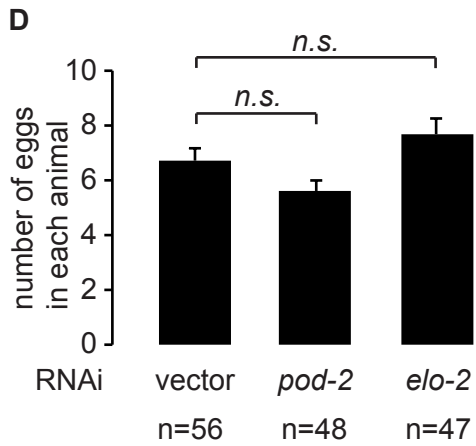

**Figure S5. Inactivation of ACC/*pod-2* and *elo-2* robustly decreases body fat without overt developmental effects, related to Figure 5.**

(A) We generated transgenic animals expressing GFP under the control of the ACC/*pod-2* promoter. A representative animal is shown. White arrowheads indicate the pharynx and the intestine. We observed GFP expression solely in the intestine.

(B) Representative images are shown of vector, *pod-2* and *elo-2* RNAi-treated wild-type animals fixed and stained with oil Red O (upper panels). Fat content was quantified for each condition and is expressed as a percentage of vector RNAi  $\pm$  SEM (lower panels; n=8-20). \*\*\*,  $p < 0.001$  by Student's t-test.

(C) Representative images are shown of living day 1 adult vector, *pod-2* and *elo-2* RNAi-treated wild-type animals.

(D) The number of eggs within each wild-type animal treated with vector, *pod-2* or *elo-2* RNAi was counted at the time of URX imaging. Data are expressed as average  $\pm$  SEM (n=47-56). n.s., not significant by one-way ANOVA.

Figure S6

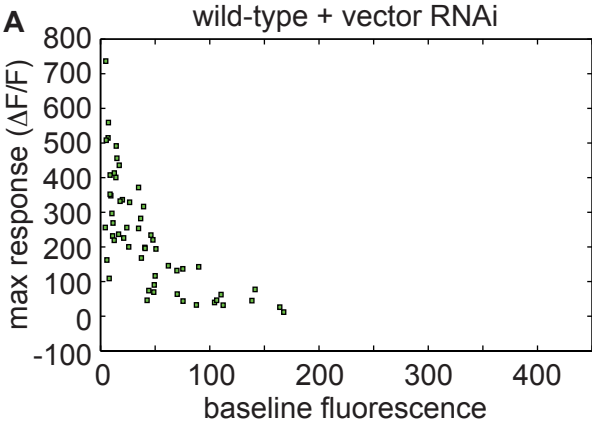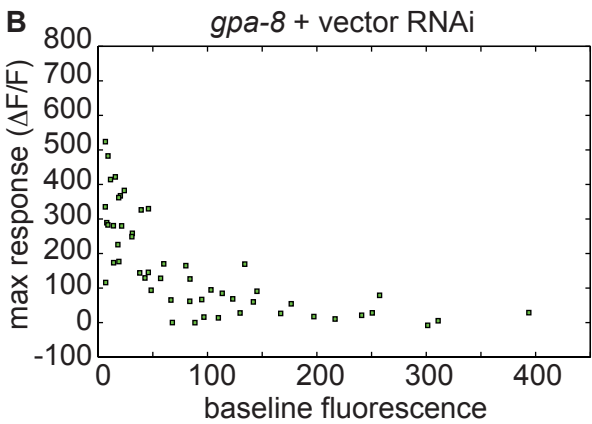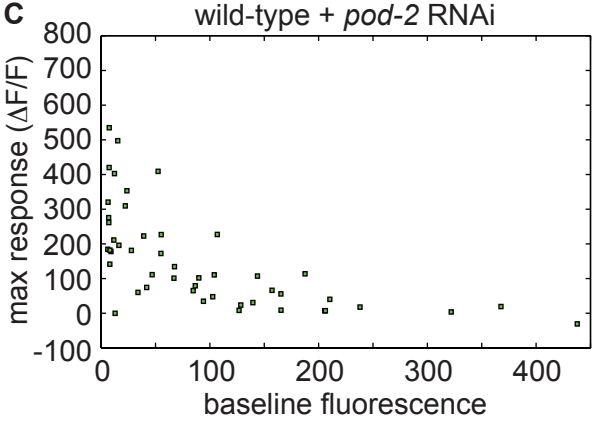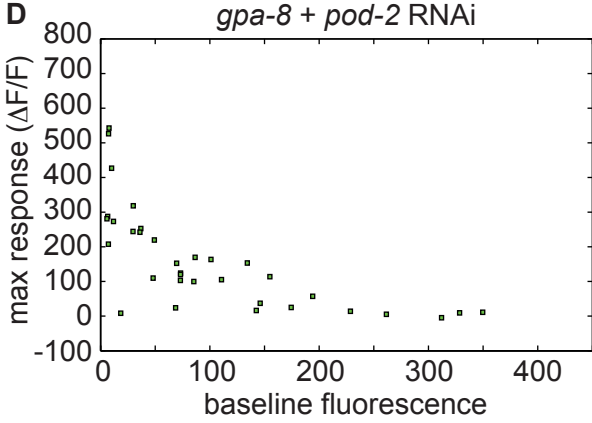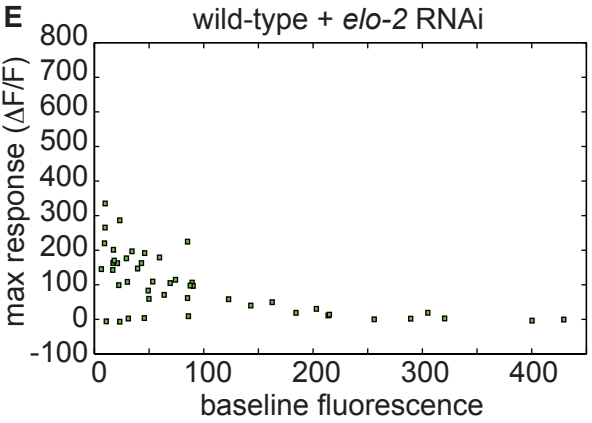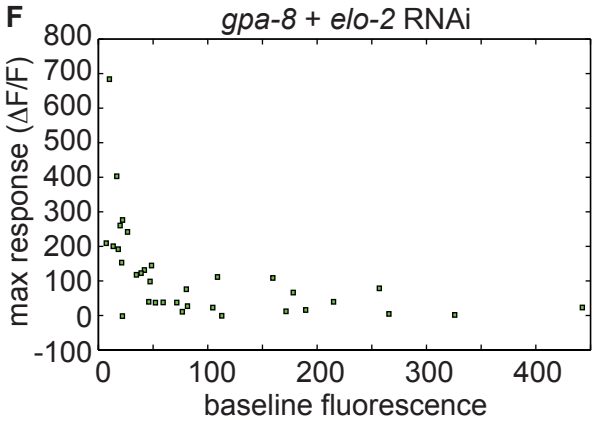



**Figure S6. RNAi-dependent body fat loss modulates URX neuronal function in a GPA-8-dependent manner, related to Figure 6.**

(A-F) Maximum  $\Delta F/F_0$  values at 21% oxygen are plotted against the baseline fluorescence at 10% oxygen ( $F_0$ ) for individual wild-type and *gpa-8* animals treated with the denoted RNAi (n=34-56).
